# Supplementary material
Source: Springer Nature journal article supplement (https://www.springermedizin.de/resource/supplementary/12958_2007_410_MOESM1_ESM.pdf/9567902)

ER $\alpha$

pituitary

*+/+*

*hpg*

*+/+*

*hpg*

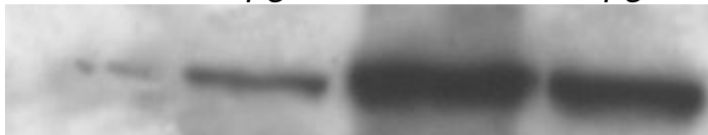

◀ 64KDa

testis

*hpg*

*+/+*

*+/+*

*hpg*

*hpg*

*+/+*

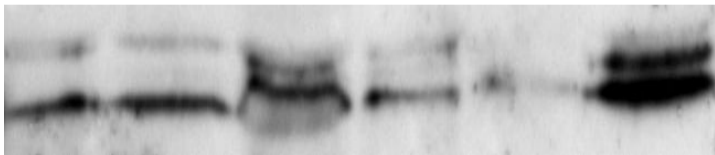

◀ 64KDa

Supplement: MOESM1 [file 9567902]
